# Supplementary material for: Argonaute 2 Restores Erectile Function by Enhancing Angiogenesis and Reducing Reactive Oxygen Species Production in Streptozotocin (STZ)-Induced Type-1 Diabetic Mice
Source: MDPI journal article supplement (doi:10.3390/ijms24032935), 2023-02-02
Supplement: s1 [file s1]

## **Supplemental Information**

### **Argonaute 2 restores erectile function by enhancing angiogenesis and reducing reactive oxygen species production in streptozotocin (STZ)-induced type 1 diabetic mice**

Fang-Yuan Liu, Guo Nan Yin, Jiyeon Ock, Fitri Rahma Fridayana, Lashkari Niloofar, Yan Huang, Minh Nhat Vo, Jun-Kyu Suh, Soon-Sun Hong, Ju-Hee Kang, and Ji-Kan Ryu

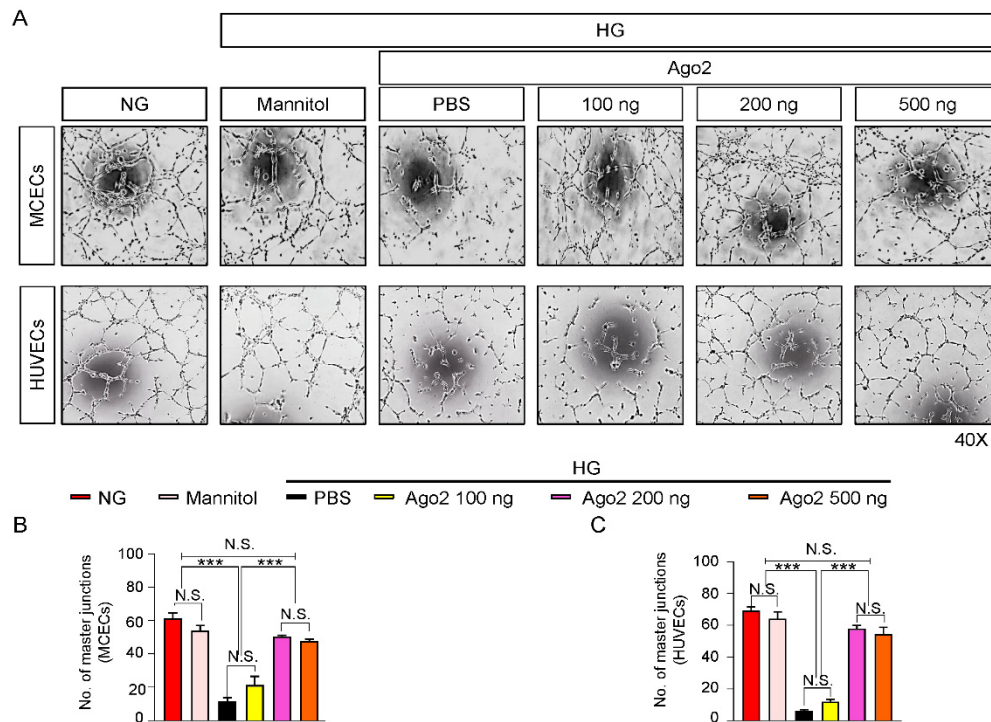

**Figure S1.** Determination of Ago2 protein optimal dosage to induce angiogenesis in endothelial cells under high-glucose conditions. (A) Tube formation assays in MCECs (A, top) and HUVECs (A, bottom) exposed to NG, mannitol (an osmotic control), or HG with PBS or Ago2 proteins (100 ng/mL, 200 ng/mL, and 500 ng/mL, respectively). (B and C) The number of master junctions in MCECs (B) and HUVECs (C) were quantified using ImageJ software ( $n = 4$ , \*\*\* $P < 0.001$ ). Magnification, 40 $\times$ . The results were presented as mean  $\pm$  SEMs. MCECs, mouse cavernous endothelial cells; HUVECs, Human umbilical vein endothelial cells; NG, normal-glucose; HG, high-glucose; N.S., not significant.

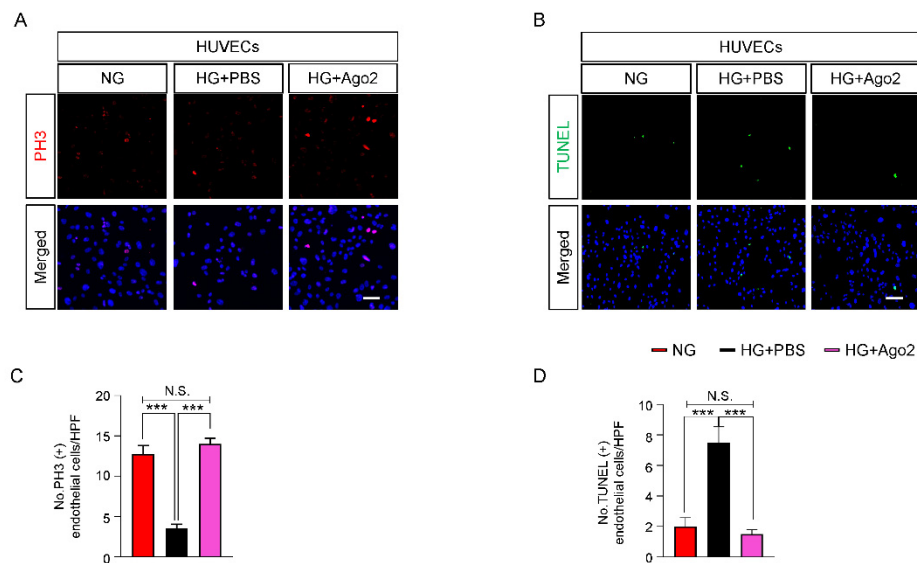

**Figure S2.** Ago2 induces HUVEC proliferation and reduces apoptosis under high glucose conditions. **(A and B)** Immunofluorescence staining for PH3 (red, **A**) and TUNEL (green, **B**) in HUVECs exposed to NG, or HG with PBS or Ago2 proteins (200 ng/mL), respectively. Scale bars, 50  $\mu$ m. Nuclei were labeled with DAPI (blue). **(C and D)** The number of PH3-positive (**C**) or TUNEL-positive (**D**) endothelial cells was quantified using ImageJ software ( $n = 4$ , \*\*\* $P < 0.001$ ). The results were presented as mean  $\pm$  SEMs. HUVECs, Human umbilical vein endothelial cells; DAPI, 4,6-diamidino-2-phenylindole; NG, normal-glucose; HG, high-glucose; N.S., not significant.

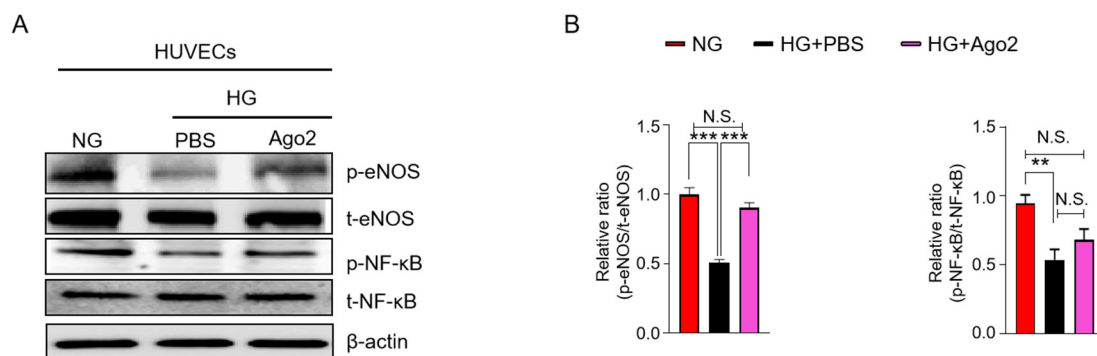

**Figure S3.** Ago2 induces eNOS Ser<sup>1177</sup> phosphorylation in HUVECs under high-glucose conditions. **(A)** Representative western blots for p-eNOS Ser<sup>1177</sup>, total eNOS,

p-NF- $\kappa$ B Ser<sup>536</sup>, and total NF- $\kappa$ B in HUVECs exposed to NG, or HG with PBS or Ago2 protein (200 ng/mL). (**B** and **C**) Normalized band intensity values were quantified using ImageJ software (n = 4, \*\*P < 0.01, \*\*\*P < 0.001). The results were presented as mean  $\pm$  SEMs. The value expressed as ratios of the NG group was arbitrarily set to 1. HUVECs, Human umbilical vein endothelial cells; NG, normal-glucose; HG, high-glucose; N.S., not significant.

**Table S1.** Physiologic and metabolic parameters: 2 weeks after treatment with Ago2

|                              |           | STZ-induced diabetic mice |           |             |             |
|------------------------------|-----------|---------------------------|-----------|-------------|-------------|
|                              | Control   | PBS                       | 1 µg Ago2 | 5 µg Ago2   | 20 µg Ago2  |
| Body weight (g)              | 32.7±1.3  | 32.6±1.1*                 | 22.4±1.2* | 22.3±1.1*   | 22.5±1.4*   |
| Fasting glucose (mg/dl)      | 101.4±4.8 | 472.0±31.3*               | 481±26.8* | 482.6±27.1* | 488.0±56.0* |
| Postprandial glucose (mg/dl) | 170.4±8.0 | 569±8.5*                  | 563±7.4*  | 588±8.9*    | 576.2±16.8* |
| MSBP (mm Hg)                 | 98.3±4.4  | 100.8±4.4                 | 98.7±3.5  | 98.1±3.0    | 97.4±3.9    |

Values are the mean±SEM for n=10 for each group. \*P<0.05 vs. Control group; STZ, streptozotocin; MSBP, mean systolic blood pressure.
